- Crosby G, Culley DJ: Retrospective analysis of perioperative variables associated with postoperative delirium and other adverse outcomes in older patients after spine surgery. *J Neurosurg Anesthesiol* 2019; 31:385–91
20. Fong TG, Hshieh TT, Wong B, Tommet D, Jones RN, Schmitt EM, Puelle MR, Saczynski JS, Marcantonio ER, Inouye SK: Neuropsychological profiles of an elderly cohort undergoing elective surgery and the relationship between cognitive performance and delirium. *J Am Geriatr Soc* 2015; 63:977–82
  21. Armaghani SJ, Lee DS, Bible JE, Archer KR, Shau DN, Kay H, Zhang C, McGirt MJ, Devin CJ: Preoperative opioid use and its association with perioperative opioid demand and postoperative opioid independence in patients undergoing spine surgery. *Spine (Phila Pa 1976)* 2014; 39:E1524–30
  22. Inouye SK, van Dyck CH, Alessi CA, Balkin S, Siegal AP, Horwitz RI: Clarifying confusion: The confusion assessment method. A new method for detection of delirium. *Ann Intern Med* 1990; 113:941–8
  23. Kuhn E, Du X, McGrath K, Coveney S, O'Regan N, Richardson S, Teodorczuk A, Allan L, Wilson D, Inouye SK, MacLulich AM, Meagher D, Brayne C, Timmons S, Davis D: Validation of a consensus method for identifying delirium from hospital records. *PLoS One* 2014; 9:e111823
  24. Aprahamian I, Cezar NOC, Izbicki R, Lin SM, Paulo DLV, Fattori A, Biella MM, Jacob Filho W, Yassuda MS: Screening for frailty with the FRAIL scale: A comparison with the phenotype criteria. *J Am Med Dir Assoc* 2017; 18:592–6
  25. Fitz-Henry J: The ASA classification and peri-operative risk. *Ann R Coll Surg Engl* 2011; 93:185–7
  26. Mayhew D, Mendonca V, Murthy BVS: A review of ASA physical status – historical perspectives and modern developments. *Anaesthesia* 2019; 74:373–9

## ANESTHESIOLOGY REFLECTIONS FROM THE WOOD LIBRARY-MUSEUM

# Jolly Holly Greetings from Pittsburgh: Advertising Analgesia Formulated by King William III's Physician

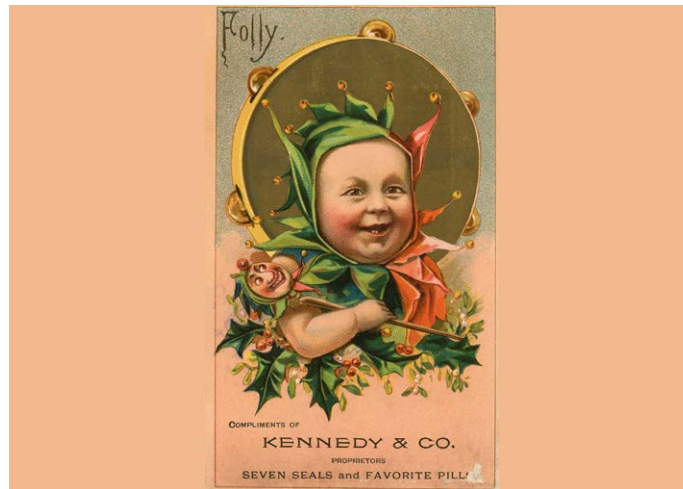

Adorned in holly, an infant dressed as a jester sends late nineteenth century holiday greetings from R. Monroe Kennedy, whose Pittsburgh-based firm manufactured the popular cure-all “Dr. Radcliffe’s Seven Seals” (*bottom*). An alcoholic elixir of ether, chloroform, capsicum, and peppermint oil, Seven Seals promised to ease woes and bring holiday cheer. The face of the baby jester’s wand grins in the background with knowing delight. This Kennedy remedy was an American version of one popularized by Dr. John Radcliffe (1650 to 1714), British Parliamentarian and royal physician to William and Mary. Radcliffe’s bustling London practice had treated patients as notable as Isaac Newton, Alexander Pope, and Jonathan Swift. An Oxford graduate, Radcliffe gave his alma mater a gift that was far from seasonal; his lavish trust has funded Oxonian ventures for centuries. As homage to his generosity, several university buildings, including the Radcliffe Science Library and the John Radcliffe Hospital, still bear his name. (Copyright © the American Society of Anesthesiologists’ Wood Library-Museum of Anesthesiology.)

*Jane S. Moon, M.D., University of California, Los Angeles, and George S. Bause, M.D., M.P.H., Case Western Reserve University, Cleveland, Ohio.*
